# Supplementary material
Source: bioRxiv or medRxiv preprint supplement (http://medrxiv.stage.highwire.org/highwire/filestream/71016/field_highwire_adjunct_files/0/2020.01.03.20016444-1.pdf)

## Appendix A

**Table A1.** Hazard Ratios (HR) with 95% confidence interval (CI) for outcomes of Incidence fracture according to the GRS group, adjusted for FRAX score: results from sensitivity analysis after excluding subjects who received intervention in either of the three clinical trials. (N=14,722)

|                                             | Major osteoporotic fracture | Hip fracture             |
|---------------------------------------------|-----------------------------|--------------------------|
|                                             | HR (95 % CI)                | HR (95 % CI)             |
| <b>Adjusted for FRAX probability</b>        |                             |                          |
| low                                         | 1(reference)                | 1(reference)             |
| medium                                      | <b>1.37 (1.11 - 1.70)</b>   | 1.32 (0.98 - 1.77)       |
| high                                        | <b>1.39 (1.10 - 1.74)</b>   | <b>1.41 (1.03 -1.95)</b> |
| <b>Adjusted for FRAX probability + race</b> |                             |                          |
| low                                         | 1(reference)                | 1(reference)             |
| medium                                      | 1.15 (0.93 - 1.43)          | 1.04 (0.77 - 1.40)       |
| high                                        | 1.18 (0.93 -1.50)           | 1.15 (0.82 -1.61)        |

*Significant results are in boldface.*

**Table A2.** Hazard Ratios (HR) with 95% confidence interval (CI) for outcomes of Incidence fracture according to the GRS group, adjusted for FRAX score: results from sensitivity analysis after excluding subjects who received intervention in either of the three clinical trials. (N=14,722)

|                                                  | Major osteoporotic fracture | Hip fracture              |
|--------------------------------------------------|-----------------------------|---------------------------|
|                                                  | HR (95 % CI)                | HR (95 % CI)              |
| <b>Adjusted for FRAX probability</b>             |                             |                           |
| Caucasian                                        | 1(reference)                | 1(reference)              |
| American Indian                                  | <b>0.31 (0.19 -0.50)</b>    | <b>0.32 (0.16 – 0.65)</b> |
| Asian                                            | <b>0.10 (0.04 - 0.28)</b>   | <b>0.15 (0.05 - 0.48)</b> |
| AA                                               | <b>0.22 (0.18 - 0.27)</b>   | <b>0.21 (0.16 - 0.28)</b> |
| Hispanic                                         | <b>0.34 (0.27 - 0.43)</b>   | <b>0.22 (0.15 - 0.31)</b> |
| <b>Adjusted for FRAX probability + GRS group</b> |                             |                           |
| Caucasian                                        | 1(reference)                | 1(reference)              |
| American Indian                                  | <b>0.30 (0.19 - 0.49)</b>   | <b>0.31 (0.15 – 0.64)</b> |
| Asian                                            | <b>0.10 (0.04 - 0.27)</b>   | <b>0.15 (0.05 - 0.47)</b> |
| AA                                               | <b>0.23 (0.18 - 0.28)</b>   | <b>0.22 (0.17 - 0.29)</b> |
| Hispanic                                         | <b>0.34 (0.27 - 0.43)</b>   | <b>0.21 (0.15 - 0.30)</b> |

*Significant results are in boldface.*

**Figure A1.** Box plot for the distribution of GRS in different race groups (N=23,981).

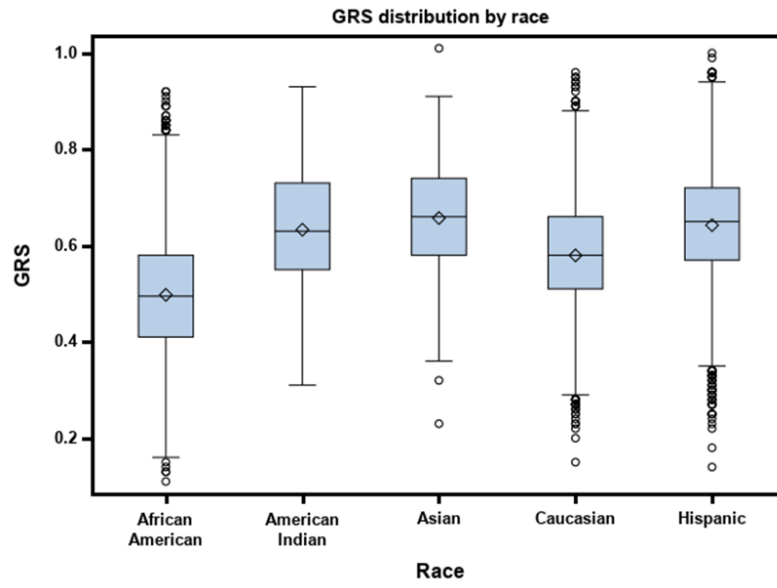

Supplement: Supplementary file [file 2020.01.03.20016444-1.pdf]
